# Supplementary material
Source: PubMed Central journal article supplement (PMC4334241)
Supplement: ic500986x_si_001.pdf [file ic500986x_si_001.pdf]

Supporting Information

for

## Spectral and Electronic Properties of Nitrosylcobalamin

*Ivan G. Pallares and Thomas C. Brunold*

**NOcbl Synthesis:** For the preparation of pure NO gas, small amounts (<1 mg) of copper tetrachloride (CuCl<sub>4</sub>), ascorbic acid, and sodium nitrite (NaNO<sub>2</sub>) were dissolved in 500  $\mu$ L of degassed MilliQ water in a vial purged with Argon gas. The reaction was allowed to proceed for 1 minute. Under positive argon pressure, a steel cannula that was connected to the vial containing the NO gas was inserted into a freshly prepared ~2 mM Co(II)cbl solution (see main text for details). A distinct color change from yellow to orange was observed upon the reaction of Co(II)cbl with NO gas. The reaction was allowed to proceed for 2 hours at room temperature before the cannula was removed and the headspace of the vial containing the NOcbl product was purged with argon for 5 minutes. Following this preparation, spectroscopic samples were prepared according to the methods outlined previously.<sup>1</sup>

**Calculation of effective number of d-electrons:** From the NBO composition of each Co-based NLMO, the effective number of Co 3d electrons can be estimated as follows.<sup>2</sup> First, the electrons in the Co-based NLMOs are partitioned into formally occupied (high occupancy) and empty (low-occupancy) NBOs.

$$\varphi_{NLMO} = \alpha \cdot \phi_{high-occ} + (1 - \alpha) \cdot \phi_{low-occ} \quad (1)$$

Where  $\alpha$  is the fractional contribution from the Co-based NBOs, obtained from the %NBO character computed for the corresponding NLMO. To obtain the Co 3d AO contributions to each NBOs, the %Co and %N compositions from our NBO analysis were used.

$$\phi_{high-occ} = \delta \cdot \chi_{Co} + (1 - \delta) \cdot \chi_{non-Co} \quad (2)$$

Where  $\delta$  is the fractional contribution from Co-based orbitals (see Table 5). To estimate the fractional number of 3d electrons,  $d$ , the contributions from the Co 3d AOs to each doubly-occupied Co-based NLMO obtained by the product of  $\delta$  and  $\alpha$  are weighted by the occupancy of the NLMO.

$$d = \sum_{NLMOs} 2 \cdot \alpha_i \cdot \delta_i \quad (3)$$

For the case where the NLMOs are singly occupied, a sum for each spin manifold is carried out.

$$d = \sum_{spin-up} 1 \cdot \alpha_i \cdot \delta_i + \sum_{spin-down} 1 \cdot \alpha_i \cdot \delta_i \quad (4)$$

**Table S1:** Compositions of selected canonical MOs of NOCbl (see Figure S13 for atom numbering scheme)

| MO  | Atom | AO | % Cont.                      | MO   | Atom | AO | % Cont. | MO              | Atom | AO  | % Cont. |    |                 |      |
|-----|------|----|------------------------------|------|------|----|---------|-----------------|------|-----|---------|----|-----------------|------|
| 158 | 1    | Co | dx <sub>2y<sup>2</sup></sub> | 85.4 | 162  | 1  | Co      | dyz             | 28.2 | 166 | 1       | Co | dyz             | 2.6  |
| 159 | 1    | Co | dxz                          | 20.7 |      | 2  | N       | pz              | 8.1  |     | 2       | N  | pz              | 7.1  |
|     | 1    | Co | dx <sub>2y<sup>2</sup></sub> | 3.6  |      | 3  | N       | pz              | 3.4  |     | 5       | N  | pz              | 7.6  |
|     | 42   | N  | px                           | 7    |      | 10 | C       | pz              | 9    |     | 9       | C  | pz              | 4.5  |
|     | 44   | N  | px                           | 6.3  |      | 11 | C       | pz              | 5.7  |     | 10      | C  | pz              | 4.9  |
|     | 45   | C  | px                           | 17.6 |      | 14 | C       | pz              | 5.7  |     | 11      | C  | pz              | 6.4  |
|     | 46   | C  | px                           | 7.1  |      | 16 | C       | pz              | 7.9  |     | 14      | C  | pz              | 11.8 |
|     | 48   | C  | px                           | 16   |      | 19 | C       | pz              | 2.3  |     | 16      | C  | pz              | 12.7 |
|     | 49   | C  | px                           | 2.3  |      | 54 | N       | py              | 2.4  |     | 19      | C  | pz              | 8    |
| 160 | 1    | Co | dxz                          | 5.2  |      | 55 | O       | py              | 2.9  |     | 20      | C  | pz              | 4.4  |
|     | 43   | C  | px                           | 11.7 | 163  | 2  | N       | pz              | 3.1  |     | 21      | C  | pz              | 5.3  |
|     | 46   | C  | px                           | 19.5 |      | 3  | N       | pz              | 9.2  | 167 | 1       | Co | dz <sub>2</sub> | 7.6  |
|     | 47   | C  | px                           | 16   |      | 4  | N       | pz              | 11.5 |     | 1       | Co | dxz             | 2.1  |
|     | 49   | C  | px                           | 15.6 |      | 5  | N       | pz              | 8.2  |     | 1       | Co | dxy             | 32.1 |
|     | 50   | C  | px                           | 14.2 |      | 10 | C       | pz              | 8    |     | 2       | N  | px              | 3.4  |
| 161 | 1    | Co | dz <sub>2</sub>              | 2    |      | 15 | C       | pz              | 14.9 |     | 3       | N  | pz              | 2.9  |
|     | 1    | Co | dxz                          | 35.2 |      | 20 | C       | pz              | 15.7 |     | 4       | N  | py              | 2.1  |
|     | 19   | C  | pz                           | 2.5  |      | 44 | N       | pz              | 2.7  |     | 5       | N  | px              | 2.6  |
|     | 42   | N  | px                           | 3.5  | 164  | 1  | Co      | dz <sub>2</sub> | 28.1 |     | 9       | C  | pz              | 3.5  |
|     | 43   | C  | px                           | 3.6  |      | 1  | Co      | dxz             | 12   |     | 11      | C  | pz              | 2.3  |
|     | 44   | N  | px                           | 4.8  |      | 44 | N       | pz              | 3.8  |     | 15      | C  | pz              | 2.4  |
|     | 45   | C  | px                           | 8.4  |      | 54 | N       | s               | 3.4  |     | 54      | N  | pz              | 4.8  |
|     | 47   | C  | px                           | 6.9  |      | 54 | N       | pz              | 7.7  |     | 55      | O  | pz              | 2.6  |
|     | 48   | C  | px                           | 9.2  |      | 54 | N       | px              | 10.3 | 168 | 53      | Co | dz <sub>2</sub> | 14.6 |
|     | 50   | C  | px                           | 2.6  |      | 55 | O       | pz              | 12.6 |     | 53      | Co | dxy             | 21.2 |
|     | 55   | O  | pz                           | 3.7  |      | 55 | O       | px              | 8.7  |     | 53      | N  | pz              | 3.5  |
|     |      |    |                              |      | 165  | 1  | Co      | dyz             | 14.8 |     | 53      | C  | pz              | 2.1  |
|     |      |    |                              |      |      | 54 | N       | py              | 47.7 |     | 53      | C  | pz              | 2.5  |
|     |      |    |                              |      |      | 55 | O       | py              | 30.6 |     | 53      | C  | pz              | 2.1  |
|     |      |    |                              |      |      |    |         |                 |      |     | 53      | C  | pz              | 3.8  |
|     |      |    |                              |      |      |    |         |                 |      |     | 53      | N  | pz              | 9.9  |
|     |      |    |                              |      |      |    |         |                 |      |     | 53      | O  | pz              | 5    |

**Table S2:** Compositions of selected canonical MOs of NOCbi<sup>+</sup> (see Figure S13 for atom numbering scheme)

| MO  | Atom | AO | % Cont.                      | MO   | Atom | AO | % Cont. | MO              | Atom | AO  | % Cont. |    |                 |      |
|-----|------|----|------------------------------|------|------|----|---------|-----------------|------|-----|---------|----|-----------------|------|
| 126 | 1    | Co | dx <sub>2y<sup>2</sup></sub> | 88.8 | 129  | 1  | Co      | dz <sub>2</sub> | 2.3  | 132 | 1       | Co | dyz             | 3.6  |
| 127 | 1    | Co | dz <sub>2</sub>              | 23.1 |      | 1  | Co      | dyz             | 20.5 |     | 1       | Co | dxy             | 2.1  |
|     | 1    | Co | dxz                          | 16.1 |      | 2  | N       | pz              | 2.8  |     | 2       | N  | pz              | 7.4  |
|     | 1    | Co | dyz                          | 2.5  |      | 4  | N       | pz              | 2.6  |     | 5       | N  | pz              | 7.2  |
|     | 3    | N  | pz                           | 4.3  |      | 5  | N       | pz              | 8.8  |     | 9       | C  | pz              | 6.3  |
|     | 4    | N  | pz                           | 2.4  |      | 10 | C       | pz              | 2.2  |     | 10      | C  | pz              | 4.4  |
|     | 9    | C  | pz                           | 2.9  |      | 11 | C       | pz              | 2.6  |     | 11      | C  | pz              | 7.8  |
|     | 10   | C  | pz                           | 3    |      | 14 | C       | pz              | 7.5  |     | 14      | C  | pz              | 12.2 |
|     | 15   | C  | pz                           | 8.2  |      | 16 | C       | pz              | 5.8  |     | 16      | C  | pz              | 12   |
|     | 21   | C  | pz                           | 3.2  |      | 19 | C       | pz              | 7.1  |     | 19      | C  | pz              | 6.7  |
|     | 45   | N  | pz                           | 2    |      | 20 | C       | pz              | 10.3 |     | 20      | C  | pz              | 4.5  |
|     | 45   | N  | px                           | 3.9  |      | 45 | N       | py              | 2.7  |     | 21      | C  | pz              | 4.6  |
|     | 46   | O  | pz                           | 8.3  |      | 46 | O       | py              | 3.2  | 133 | 1       | Co | pz              | 4.7  |
|     | 46   | O  | px                           | 3.5  | 130  | 1  | Co      | dz <sub>2</sub> | 17   |     | 1       | Co | dz <sub>2</sub> | 20.5 |
| 128 | 1    | Co | dxz                          | 37.3 |      | 1  | Co      | dxz             | 20   |     | 1       | Co | dxy             | 9.7  |
|     | 2    | N  | pz                           | 6.3  |      | 3  | N       | pz              | 3.9  |     | 3       | N  | pz              | 3    |
|     | 3    | N  | pz                           | 3.8  |      | 4  | N       | pz              | 3.5  |     | 15      | C  | pz              | 3.2  |
|     | 4    | N  | pz                           | 2.1  |      | 10 | C       | pz              | 3.6  |     | 45      | N  | pz              | 17.9 |
|     | 5    | N  | pz                           | 2.4  |      | 15 | C       | pz              | 4    |     | 45      | N  | px              | 5.2  |
|     | 10   | C  | pz                           | 9    |      | 20 | C       | pz              | 3.6  |     | 46      | O  | pz              | 10.5 |
|     | 11   | C  | pz                           | 5.9  |      | 45 | N       | s               | 3.1  |     | 46      | O  | px              | 2.5  |
|     | 15   | C  | pz                           | 4.3  |      | 45 | N       | pz              | 4.9  | 134 | 1       | Co | dz <sub>2</sub> | 7.1  |
|     | 19   | C  | pz                           | 2.4  |      | 45 | N       | px              | 7.4  |     | 1       | Co | dxy             | 38.8 |
|     | 20   | C  | pz                           | 4    |      | 46 | O       | pz              | 7    |     | 2       | N  | px              | 2.3  |
|     | 46   | O  | pz                           | 2.2  |      | 46 | O       | px              | 6.1  |     | 3       | N  | px              | 2.3  |
|     |      |    |                              |      | 131  | 1  | Co      | dyz             | 16.4 |     | 3       | N  | py              | 2.1  |
|     |      |    |                              |      |      | 45 | N       | py              | 48   |     | 5       | N  | px              | 4.5  |
|     |      |    |                              |      |      | 46 | O       | py              | 30.4 |     | 14      | C  | pz              | 2.5  |
|     |      |    |                              |      |      |    |         |                 |      |     | 45      | N  | pz              | 5.4  |
|     |      |    |                              |      |      |    |         |                 |      |     | 46      | O  | pz              | 2.8  |

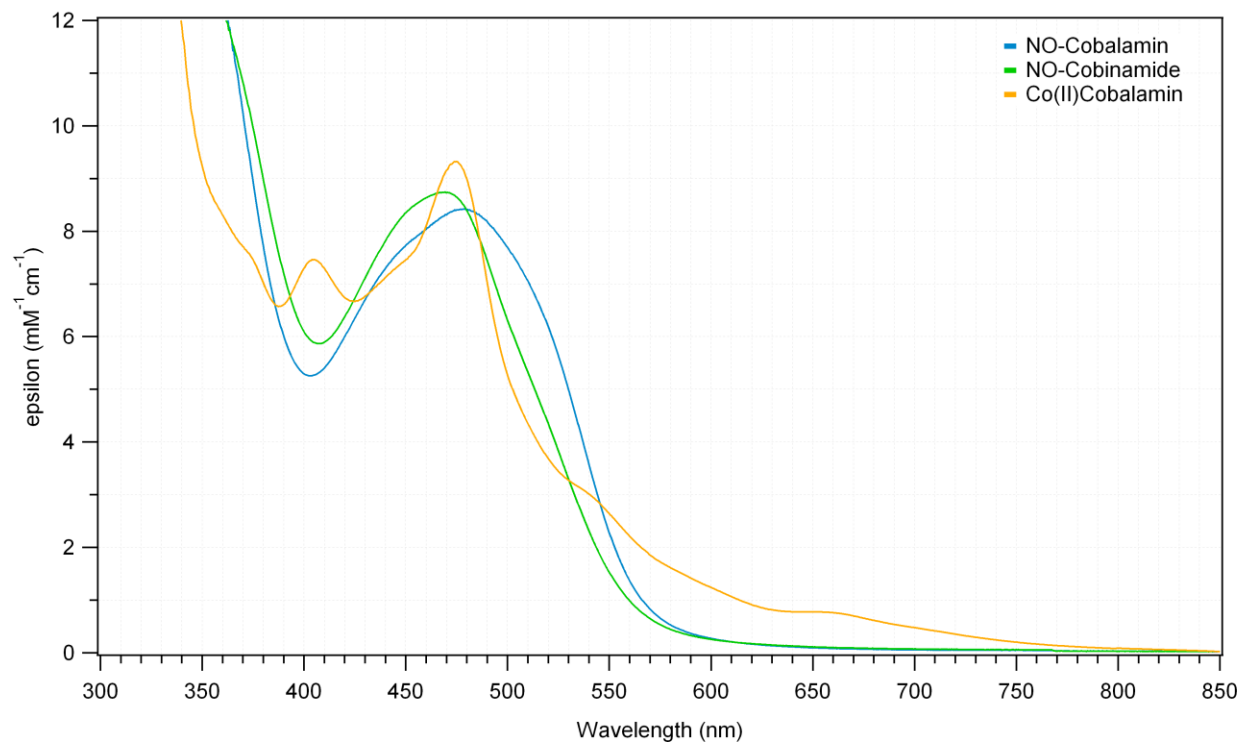

**Figure S1:** Abs spectra at 298 K of Co(II)Cbl and Co(II)Cbi<sup>+</sup> after exposure to NO gas overlaid with the Abs spectrum of Co(II)Cbl. The absence of features above 600 nm in the Abs spectra of NOCbl and NOCbi<sup>+</sup> indicates that the amount of unreacted Co(II) species is negligible.

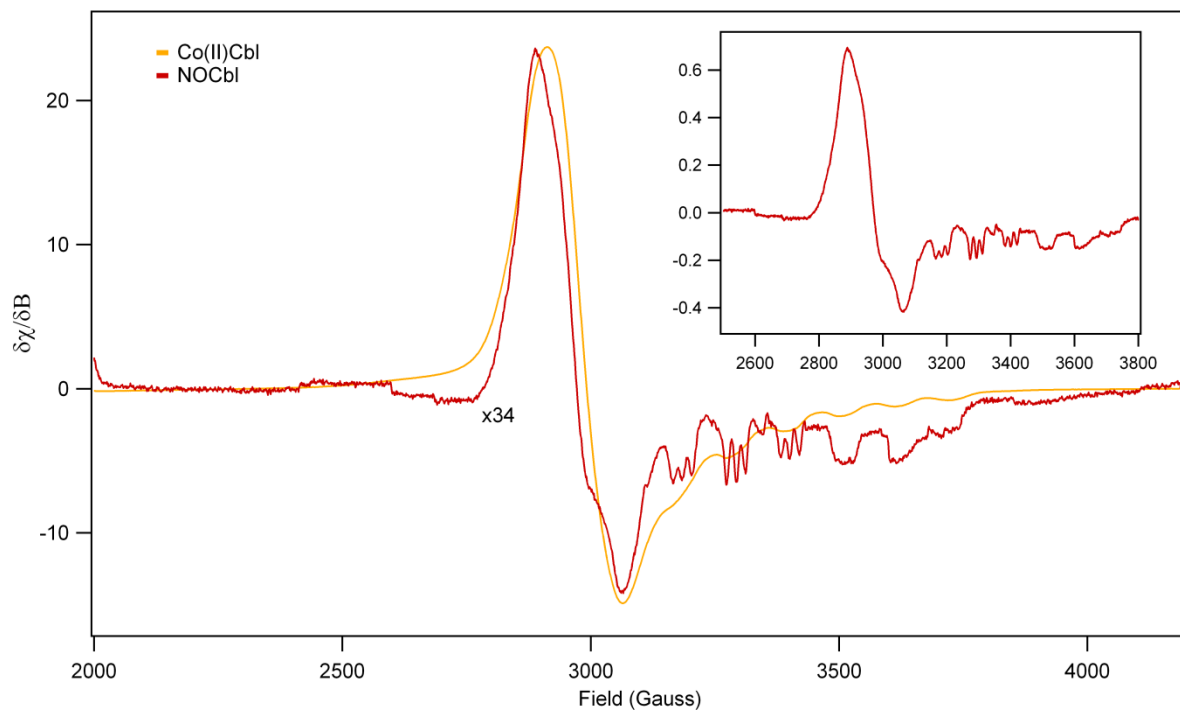

**Figure S2:** 40 K EPR spectra of  $\text{Co(II)Cbl}$  before (yellow) and after (red) exposure to NO gas. Because the red trace had to be magnified 34-fold to match the signal intensity of the yellow trace, it can be estimated that less than 3% of unreacted  $\text{Co(II)Cbl}$  remained in solution. Inset: unscaled EPR spectrum of  $\text{NOCbI}$ .

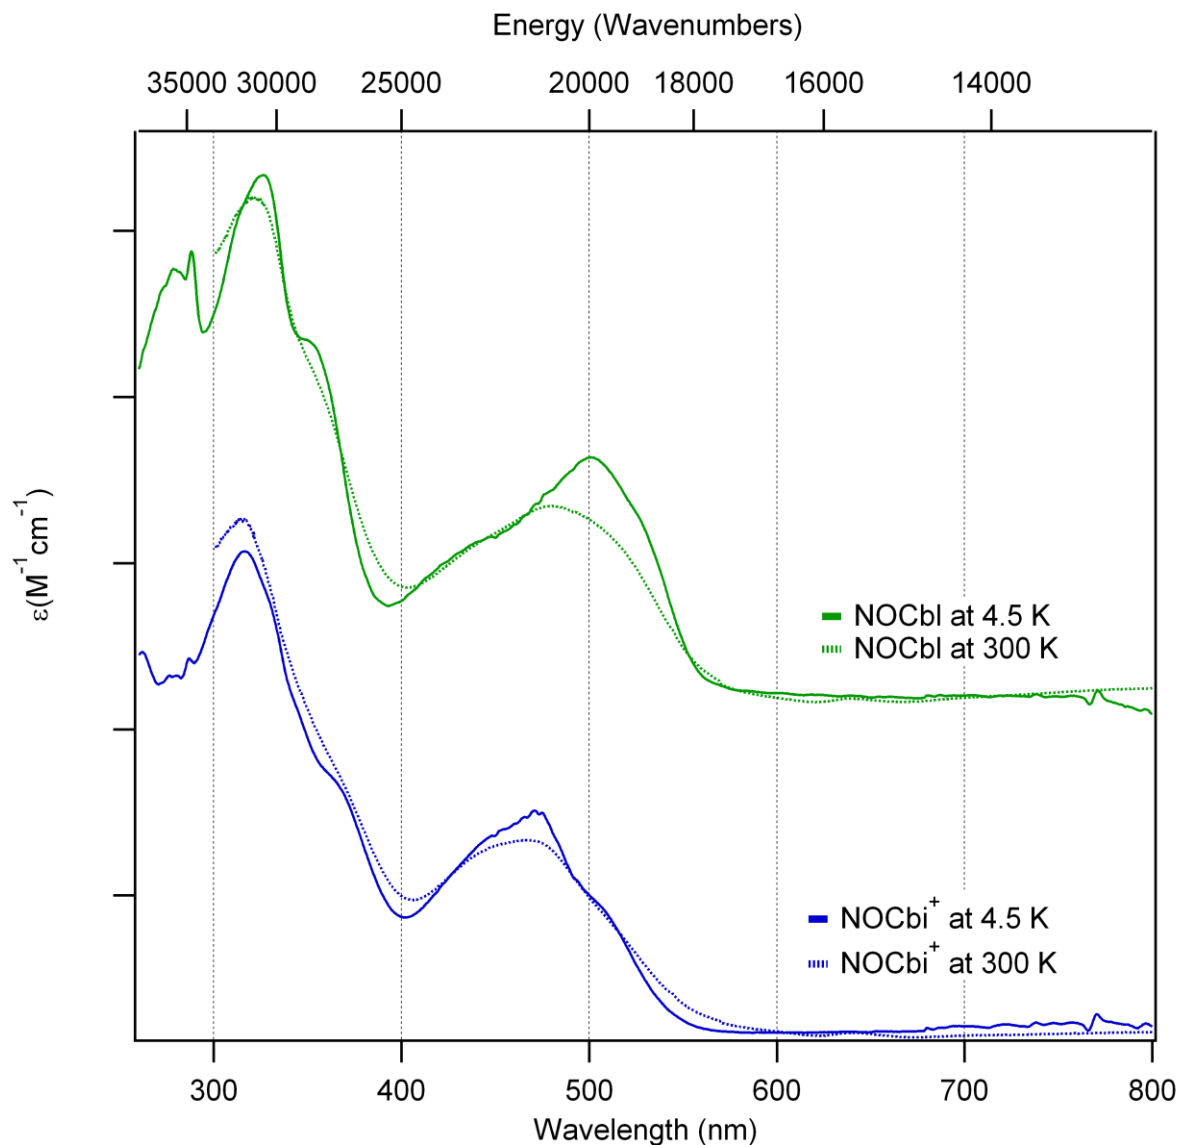

**Figure S3:** Abs spectra of NOCbl and NOCbi<sup>+</sup> at 4.5 K and 300 K in 60:40 (v:v) glycerol:water solution. The blue-shift of the  $\alpha$ -band observed for NOCbl from 4.5 to 300 K reflects sizable changes in the Co(II) coordination environment. In contrast, the lack of a similar band shift observed for NOCbi<sup>+</sup> indicates that in this case the Co(II) coordination environment does not change as a function of temperature.

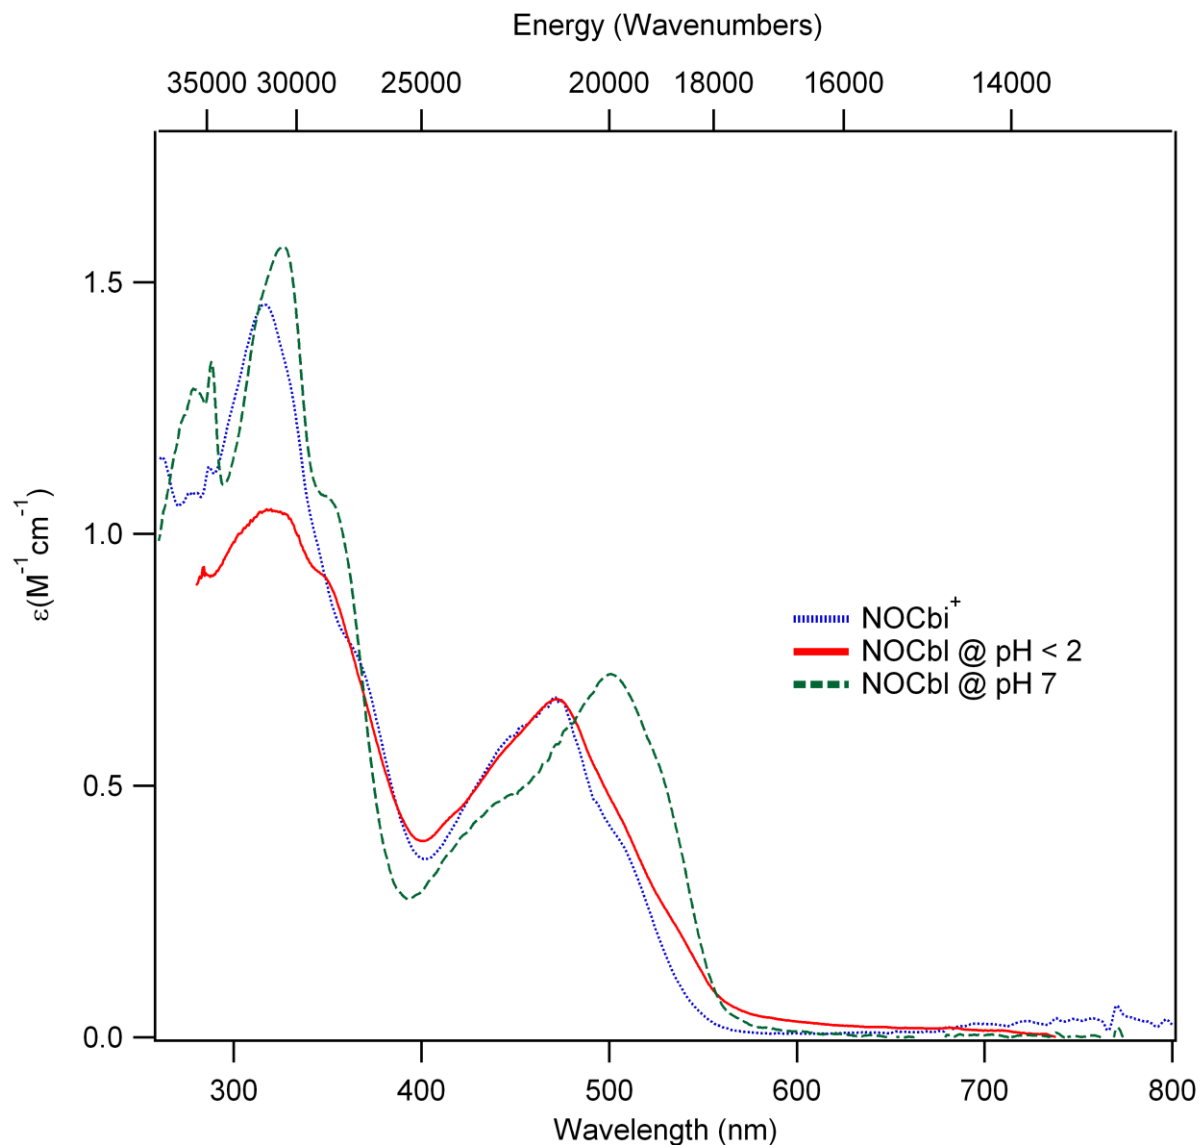

**Figure S4:** Abs spectra of NOCbl at  $\text{pH} < 2$  and of NOCbl and  $\text{NOCbi}^+$  at neutral pH, collected at 4.5 K in 60:40 (v:v) glycerol:water solution. At low pH, NOCbl is present predominantly in the base-off state, as shown by the blueshift of the  $\alpha$ -band upon acidification and the similarity of the resulting spectrum with that of  $\text{NOCbi}^+$ .



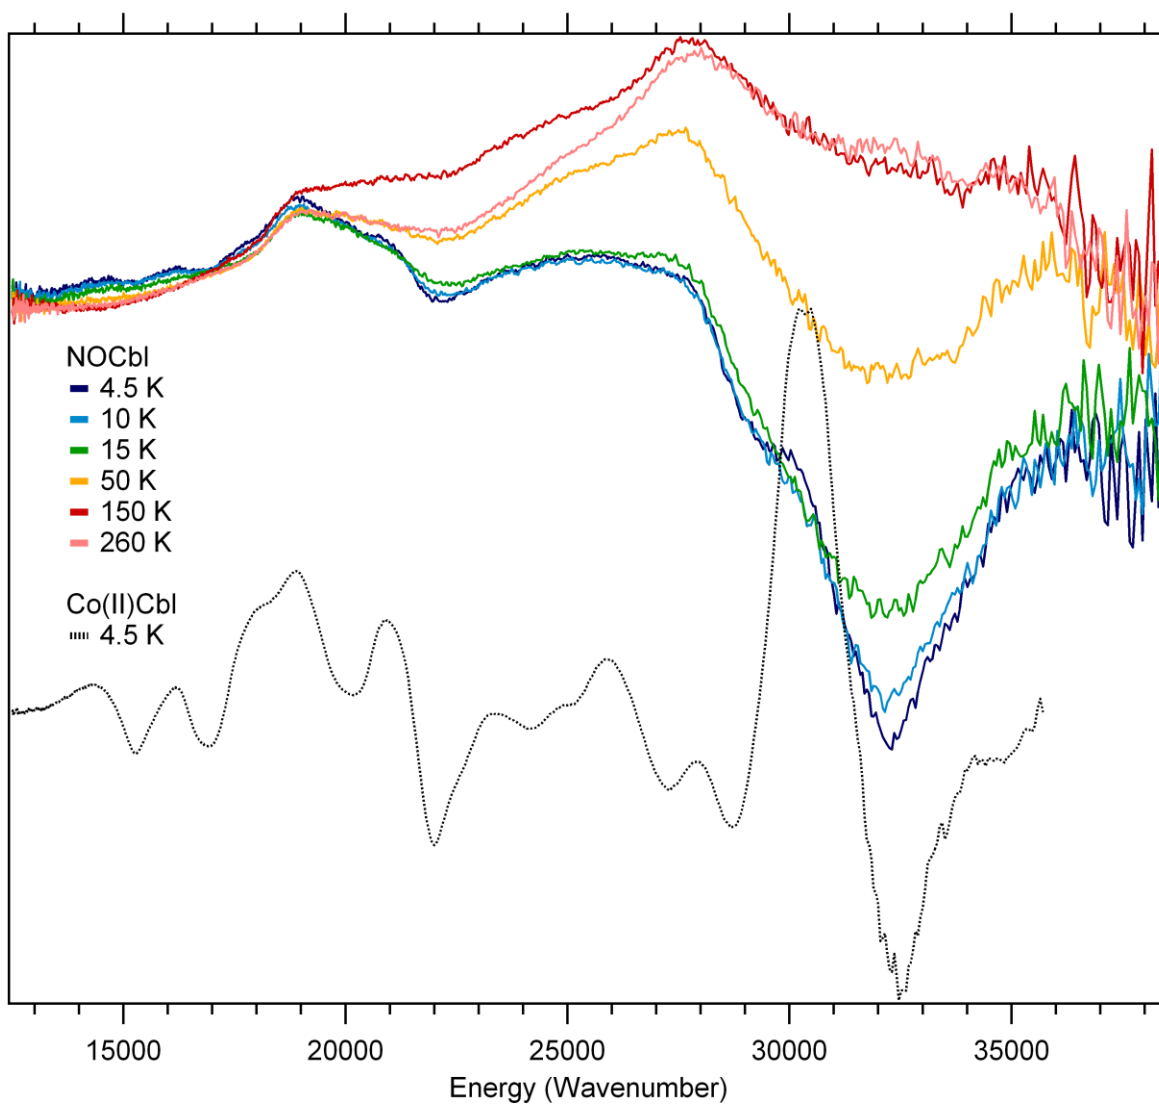

**Figure S5:** 7 T MCD spectra at various temperatures of NOCbl in the “base-on” state (top) traces and at 4.5 K of Co(II)Cbl. The minor temperature dependence of the features in the NOCbl spectra is due to changes in glass strain and band width as a function of temperature.

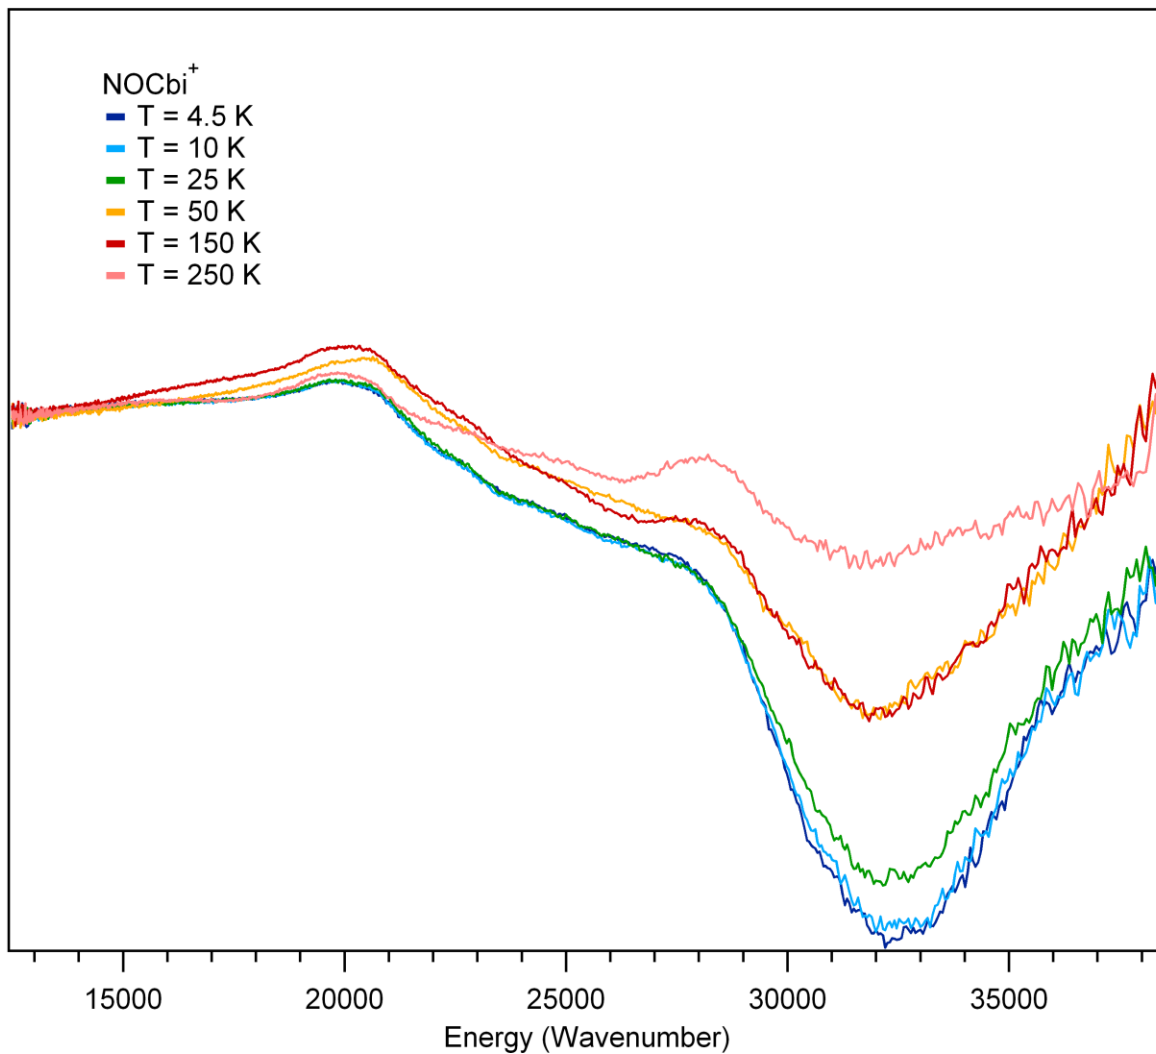

**Figure S6:** 7 T MCD spectra at various temperatures of NOCbi<sup>+</sup>, a model of “base-off” NOCbl. The minor temperature dependence of the observed features is due to changes in glass strain and band width as a function of temperature.

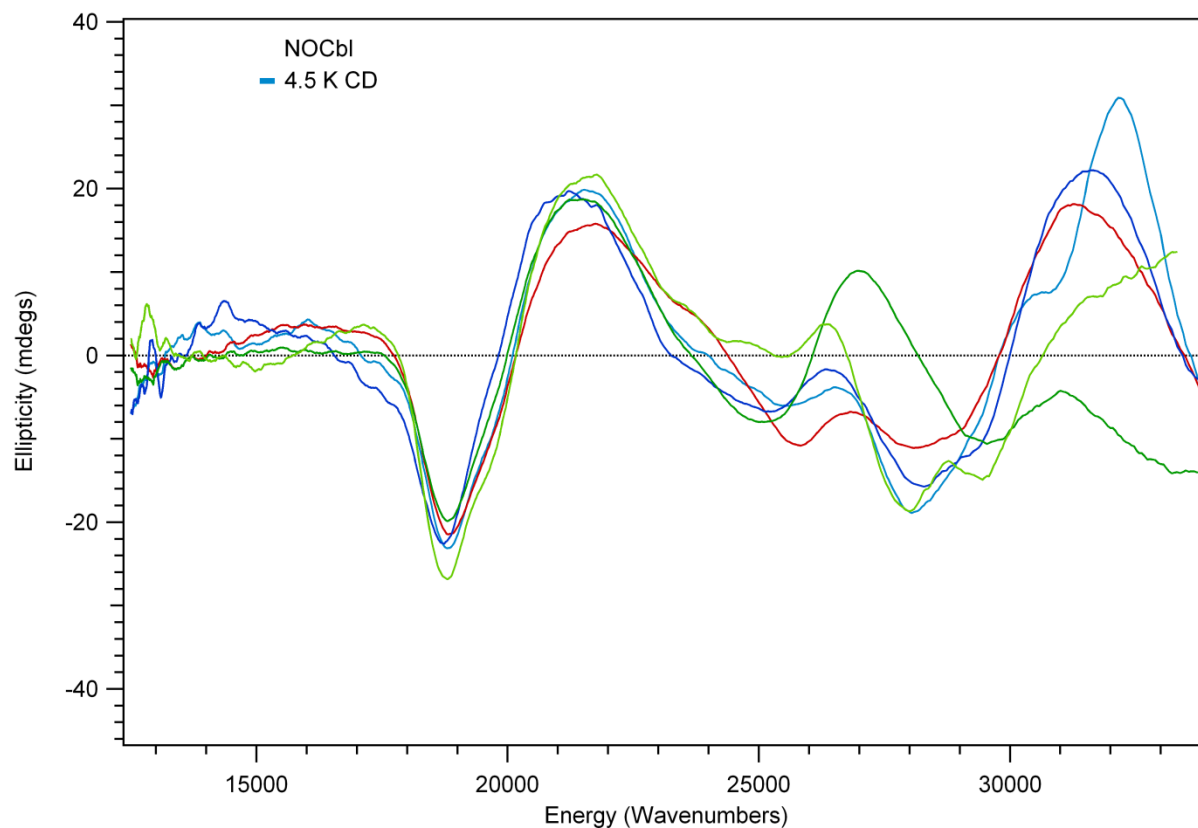

**Figure S7:** 4.5 K CD spectra of several independently prepared NOCbl samples. Although the CD features at higher energies are not fully reproducible, the predominant derivative-shaped feature at  $19,000\text{ cm}^{-1}$  is consistently observed.

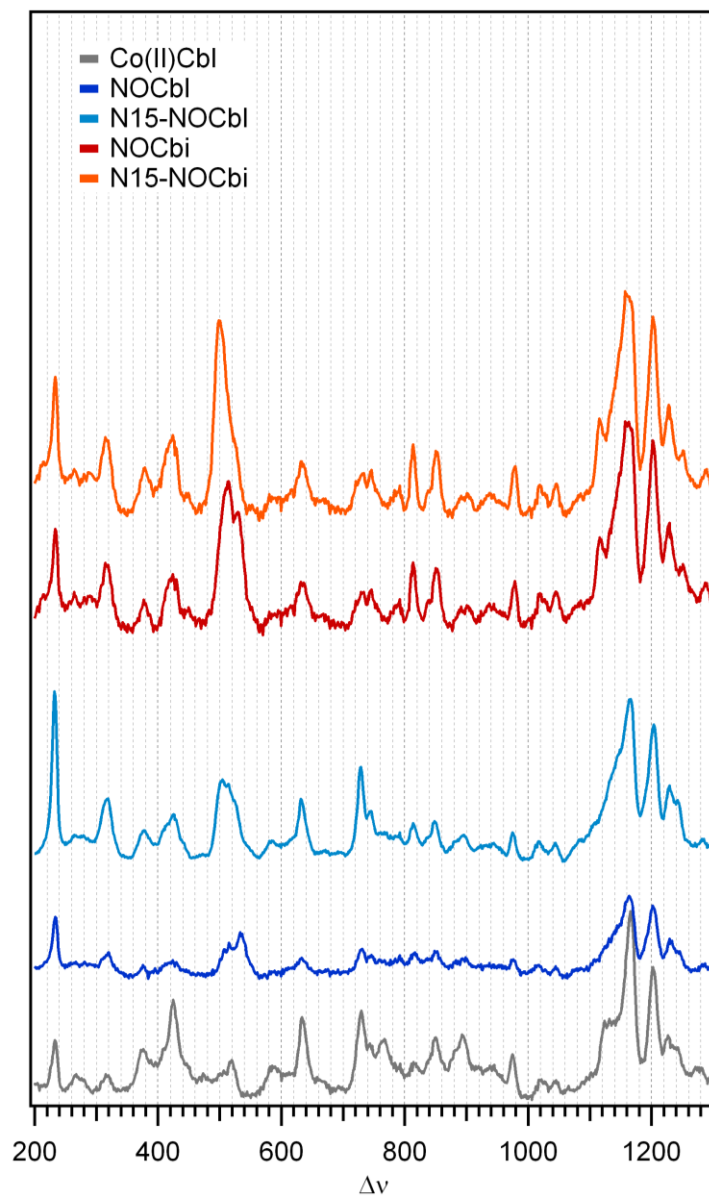

**Figure S8:** Low-energy region of rR spectra of Co(II)Cbl, NOCbl, and NOCbi<sup>+</sup> obtained at 77 K with 488 nm ( $20\,491\text{ cm}^{-1}$ ) laser excitation

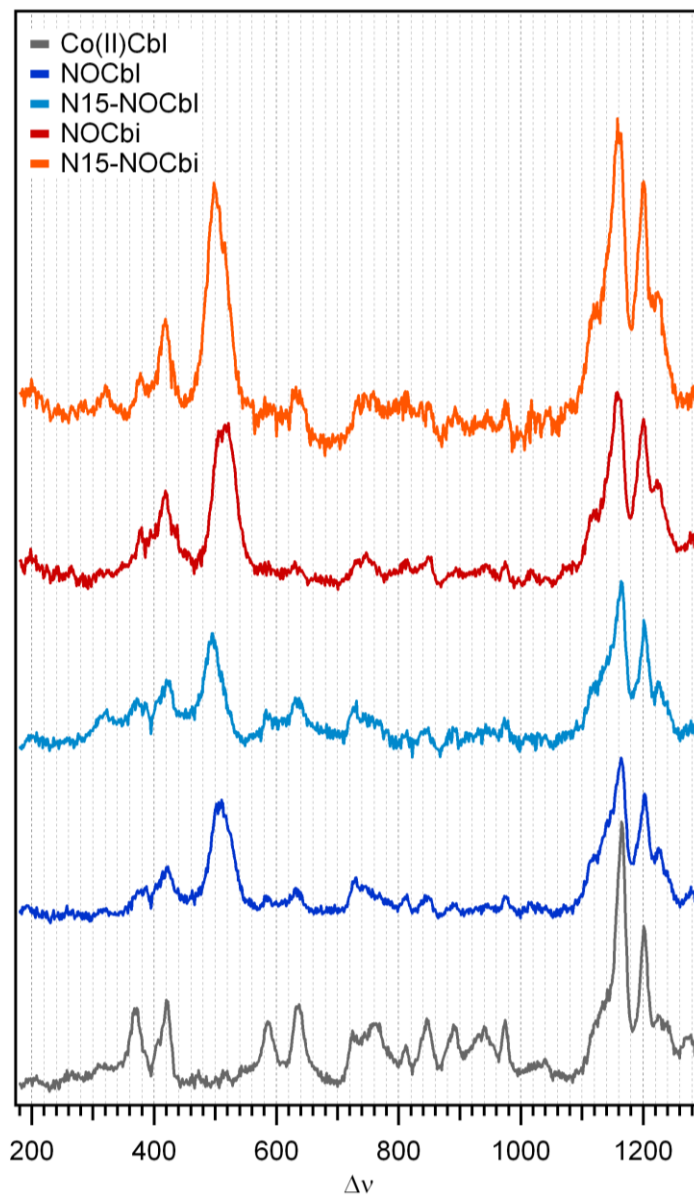

**Figure S9:** Low-energy region of rR spectra of Co(II)Cbl, NOCbl, and NOCbi<sup>+</sup> obtained at 278 K with 488 nm (20 491 cm<sup>-1</sup>) laser excitation. Note that changes from the 77 K spectra can be attributed to band broadening at higher temperature.

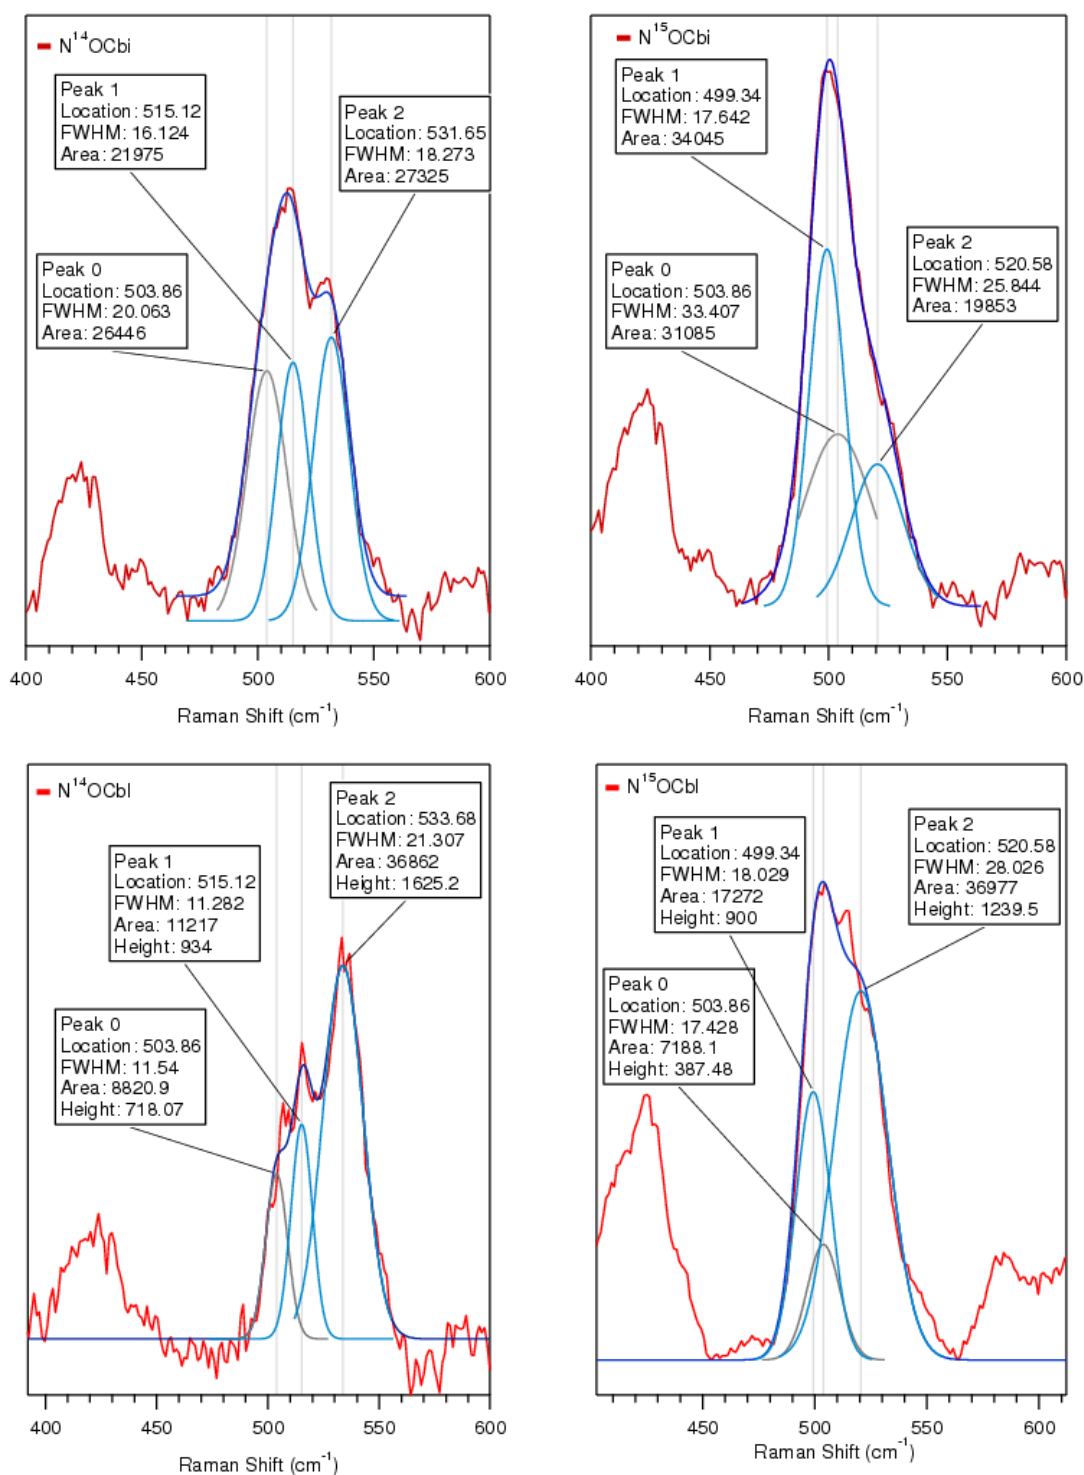

**Figure S10:** Gaussian deconvolution of the 77 K rR spectra of NOCbl, NOCbi<sup>+</sup>, and their corresponding <sup>15</sup>NO-enriched spectra. Experimental traces are shown in red and fits are shown in dark blue. Individual isotope sensitive bands are shown in light blue, while the isotope-insensitive feature at ~504 cm<sup>-1</sup> is shown in gray.

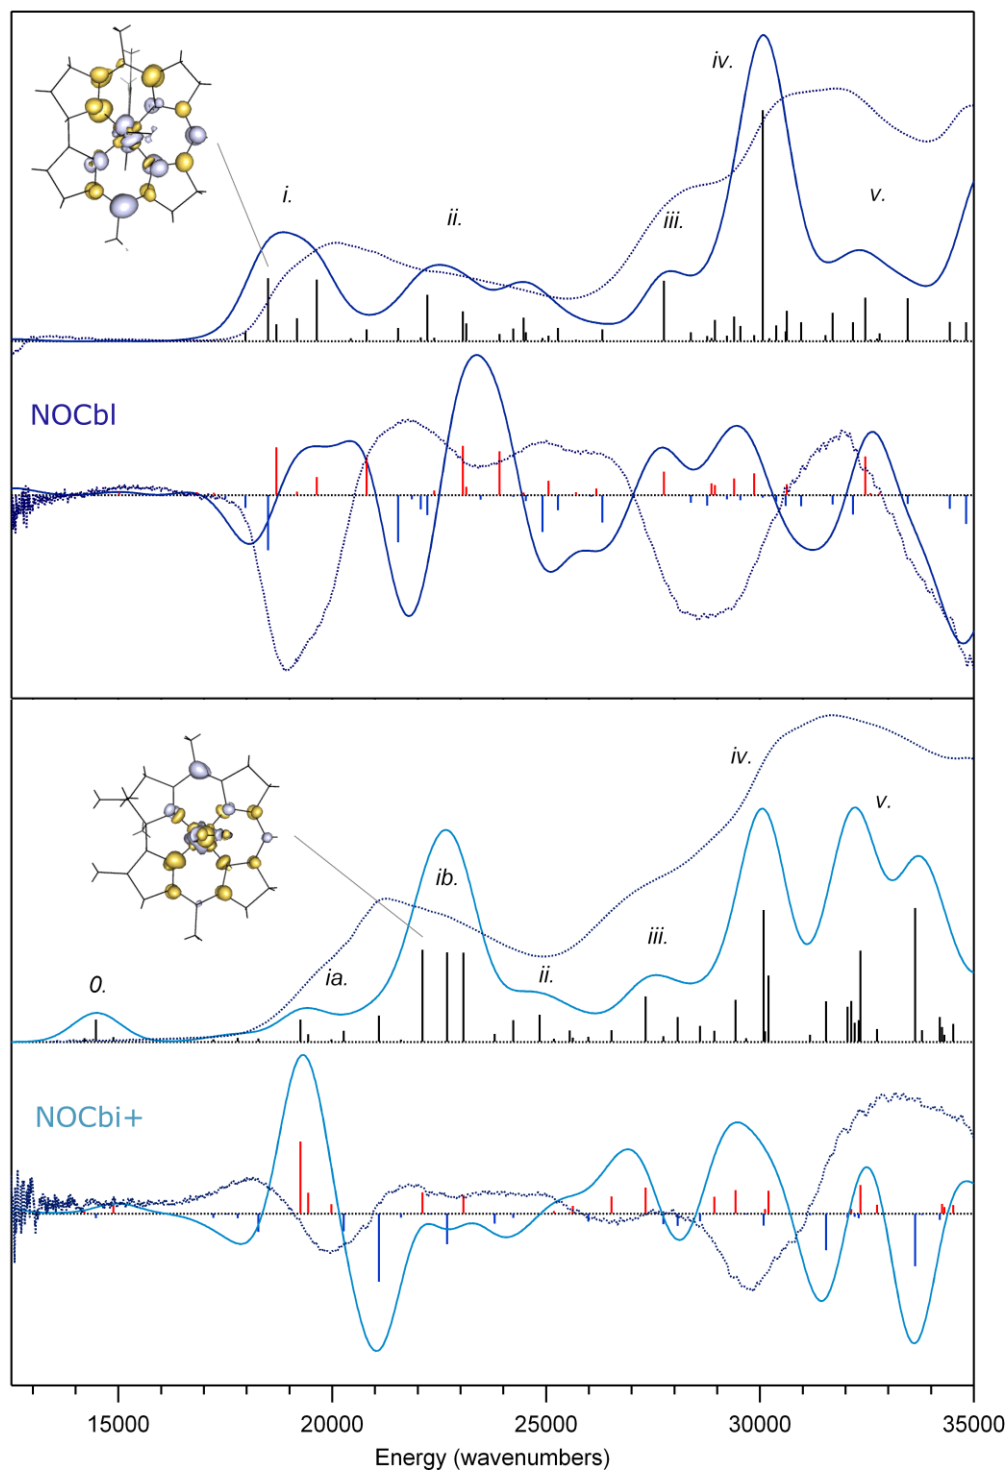

**Figure S11:** Abs and CD spectra of NOCbl (top) and NOCbi<sup>+</sup> (bottom) collected at 4.5 K (in dotted lines) superimposed on the TDDFT results. The TDDFT transitions (vertical sticks) were convoluted with Gaussian bands, using a constant FWHM of 1,250 cm<sup>-1</sup> to yield the solid traces (dark blue for NOCbl, and light blue for NOCbi<sup>+</sup>). The EDDM for the  $\alpha$ -band transition is shown on the left. Note the alternating regions of loss (gray) and gain (gold) of electron density. The calculated spectra were uniformly red-shifted by 2,200 cm<sup>-1</sup> to facilitate a direct comparison with the experimental results.

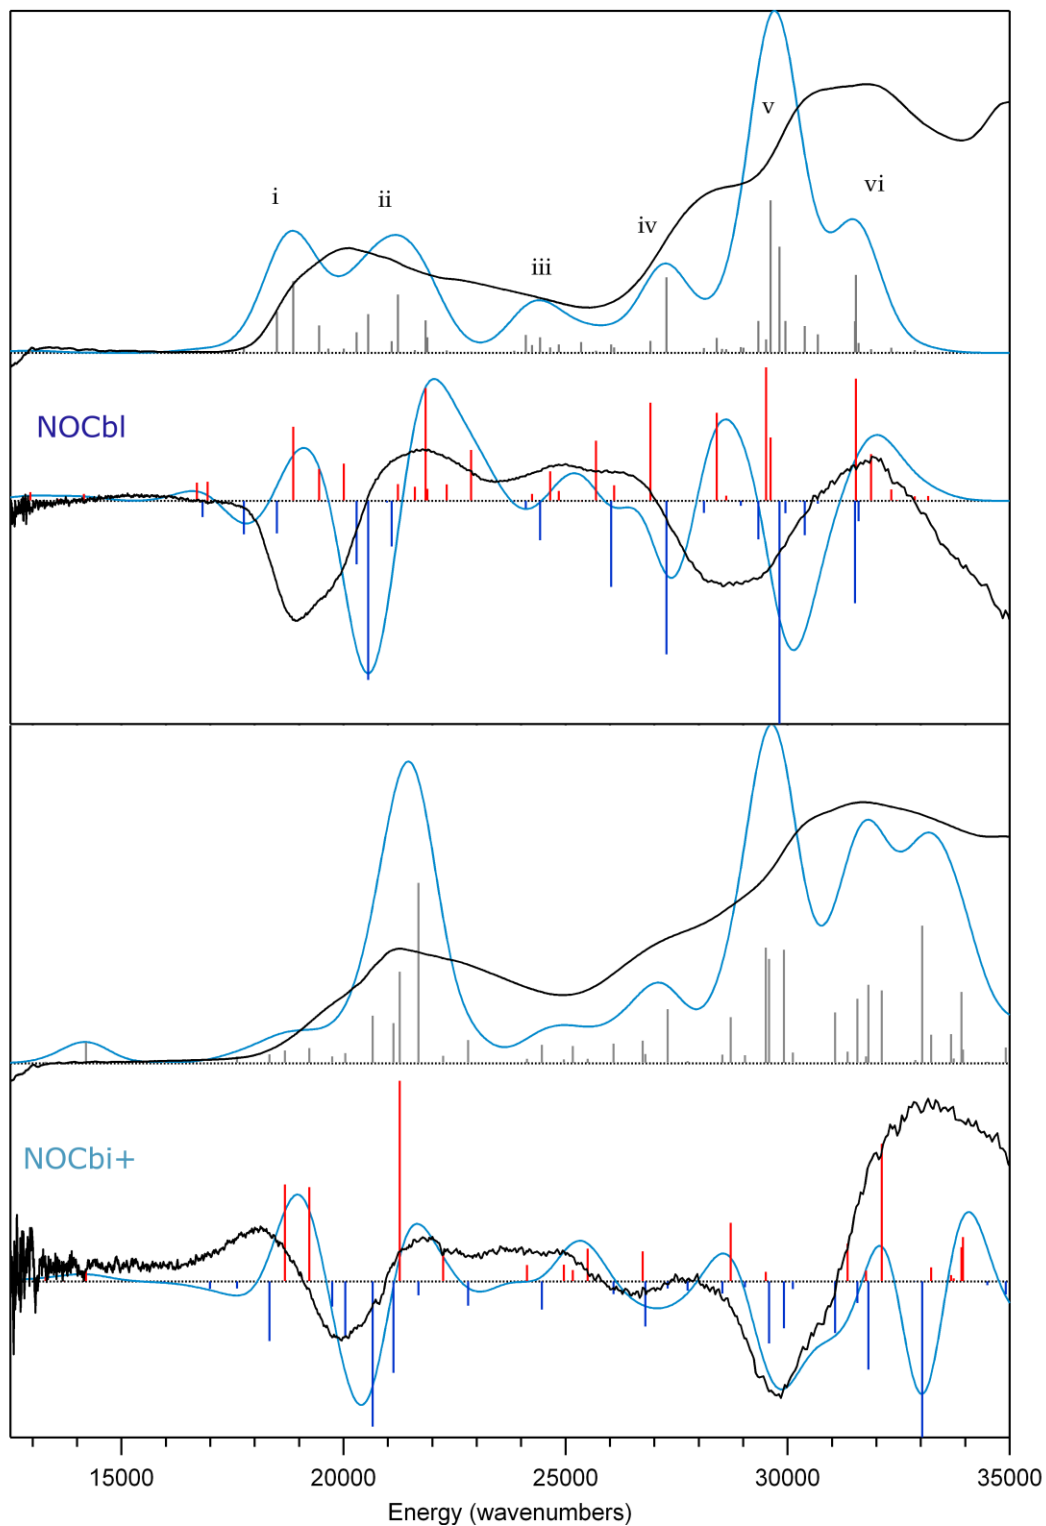

**Figure S12:** Abs and CD spectra of NOCbI (top) and NOCbI<sup>+</sup> (bottom) collected at 4.5 K (in black lines) superimposed on the TDDFT results for the truncated structural models of base-on (top) and base-off NOCbI (bottom) in blue lines. The TDDFT transitions (vertical sticks) were convoluted with Gaussian bands, using a constant FWHM of 1,250 cm<sup>-1</sup> to yield the solid traces. The calculated spectra were uniformly red-shifted by 3,000 cm<sup>-1</sup> to facilitate a direct comparison with the experimental results.



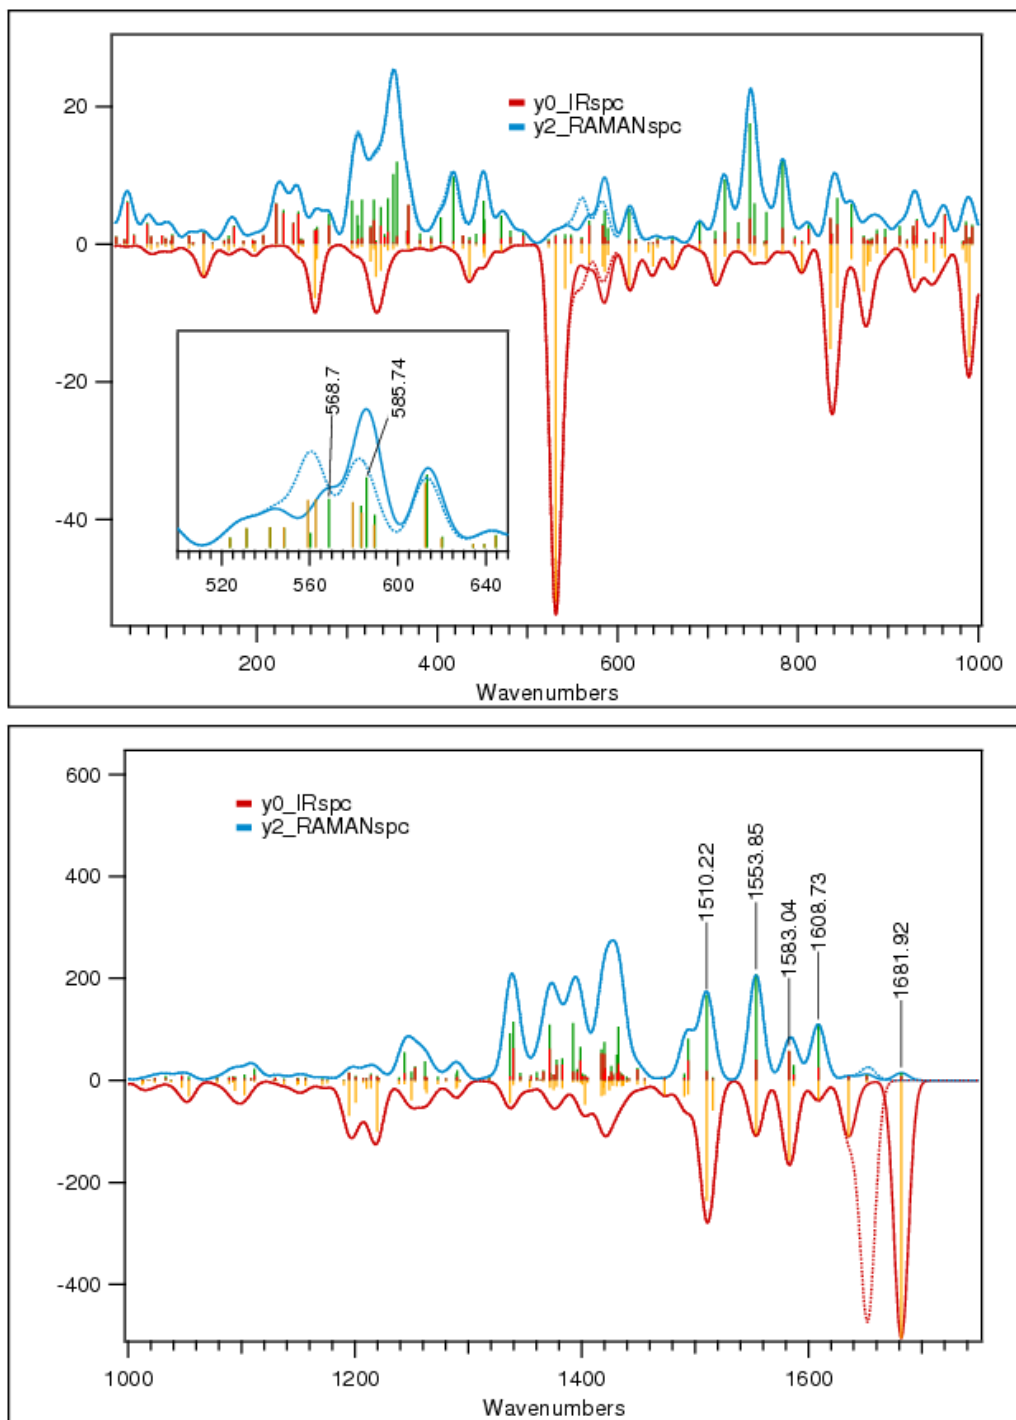

**Figure S13:** Calculated infrared (red traces, yellow sticks) and off-resonance Raman (blue traces, green sticks) spectra of NOCbl (solid lines) and  $^{15}\text{NOCbl}$  (dotted lines). Top panel: low-energy region; bottom panel: high-energy region. Sticks indicate the individual transitions, which were convoluted with a  $5\text{ cm}^{-1}$  Gaussian band to yield the spectral traces. The inset highlights the isotope-sensitive Co-NO modes. The depolarization ratios of the Raman transitions are shown by the red contributions to the individual sticks. No red indicates a depolarization ratio of 0, while fully red corresponds to a depolarization ratio of 0.75.

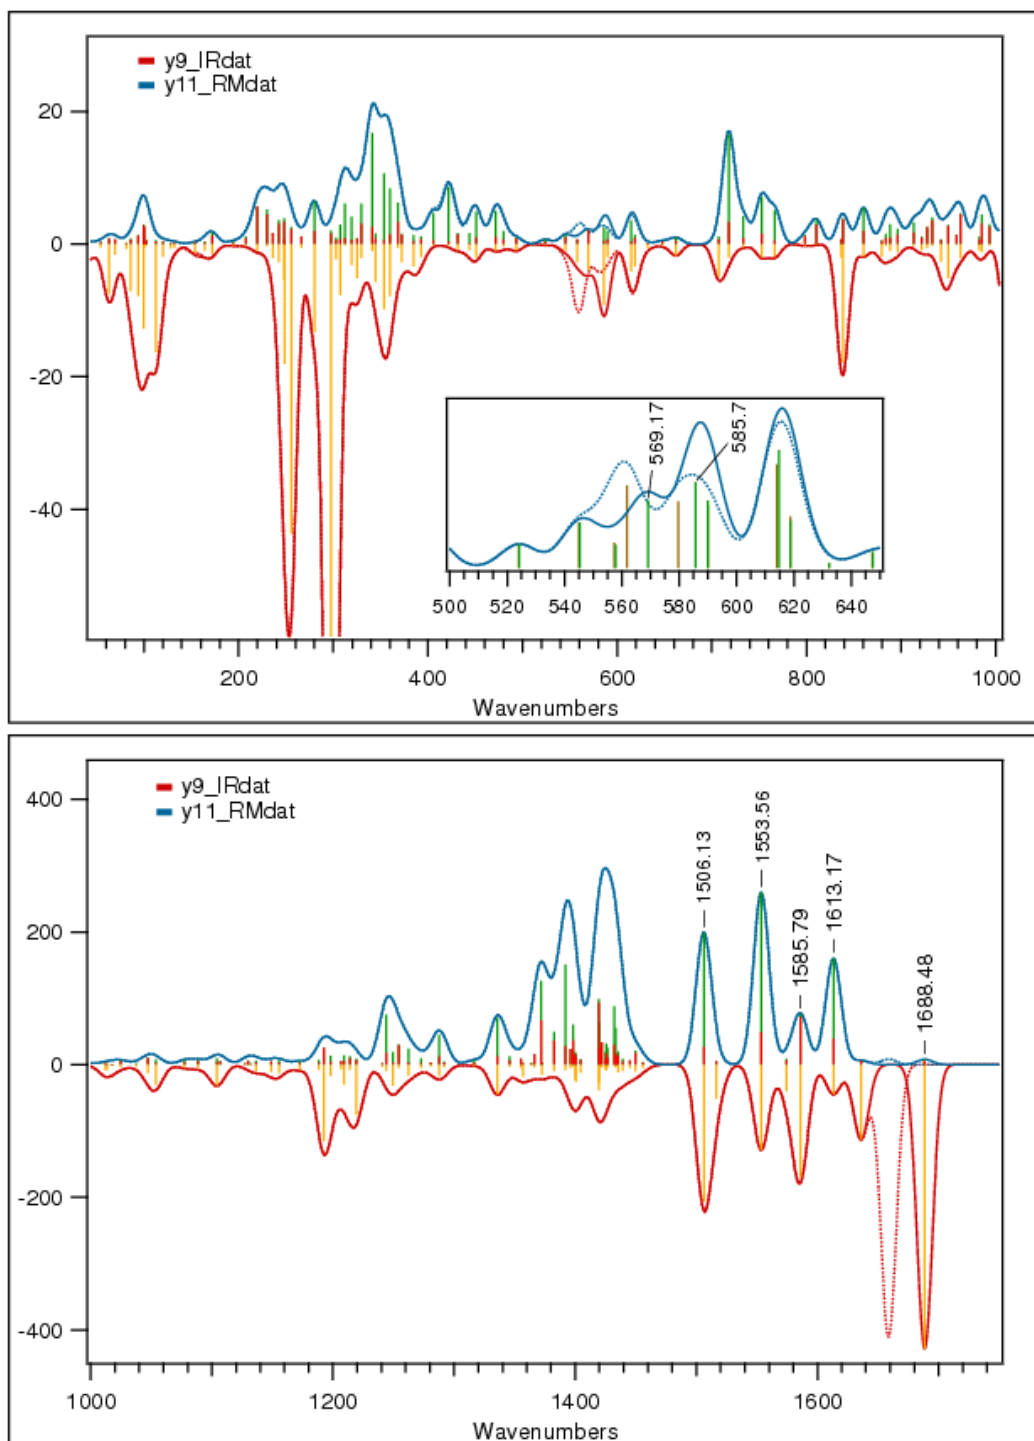

**Figure S14:** Calculated infrared (red traces, yellow sticks) and off-resonance Raman (blue traces, green sticks) spectra of  $\text{NOCbi}^+$  (solid lines) and  $^{15}\text{NOCbi}^+$  (dotted lines). Top panel: low-energy region; bottom panel: high-energy region. Sticks indicate the individual transitions, which were convoluted with a  $5 \text{ cm}^{-1}$  Gaussian band to yield the spectral traces. The inset highlights the isotope-sensitive Co-NO modes. The depolarization ratios of the Raman transitions are shown by the red contributions to the individual sticks. No red indicates a depolarization ratio of 0, while fully red corresponds to a depolarization ratio of 0.75.

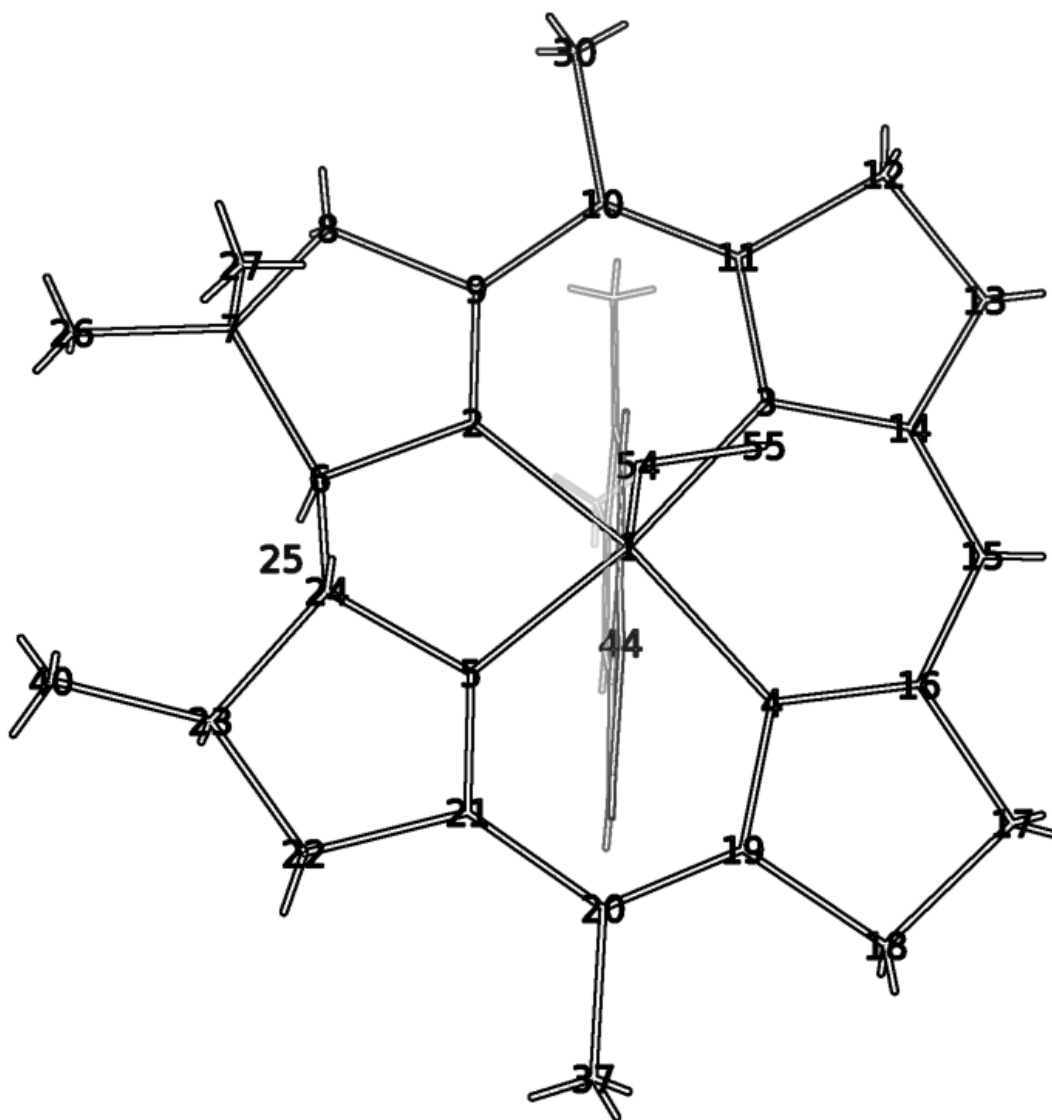

**Figure S15.** Truncated NOCbl model employed in this work showing the atom numbering scheme used in Table S1. Only the labels for non-hydrogen atoms of the corrin ring, the NO ligand, and the coordinating N atom of the DMB ligand are shown.

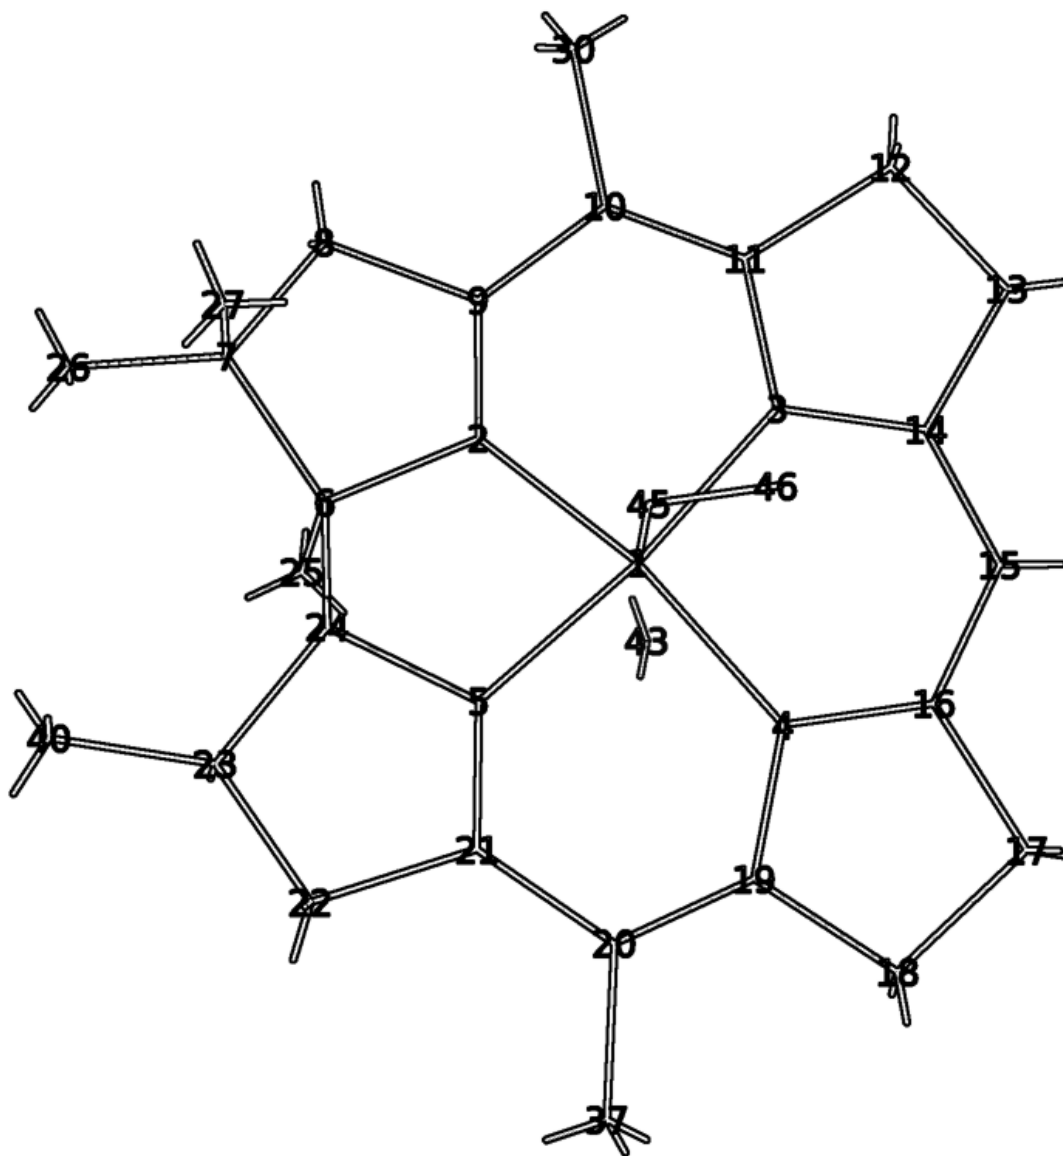

**Figure S16.** Truncated NOCbi<sup>+</sup> model employed in this work showing the atom numbering scheme used in Table S2. Only the labels for non-hydrogen atoms of the corrin ring, the NO ligand, and the O atom of the water ligand are shown.

## References

- (1) Smith, A. T.; Majtan, T.; Freeman, K. M.; Su, Y.; Kraus, J. P.; Burstyn, J. N. *Inorganic Chemistry* **2011**, *50*, 4417.
- (2) Weinhold, F.; Landis, C. L. *Valency and Bonding*; Cambridge University Press, 2005.
